# Supplementary material
Source: HighWire-hosted journal article supplement (doi:10.1101/rna.053991.115)
Supplement: Supp_Table1.xlsx [file Supp_Table1.xlsx]

## Sheet: Tabelle1
					5'ss oligonucleotide			sequence													B-like formation	S-value	co-
																					on native gel		purification
						wildtype		A	A	G	/	G	U	A	A	G	U	A	U		+++	45S	+
						2'Ome		A	A	G	/	G	U	A	A	G	U	A	U		-	37S	-
						U5:5'ss		U	U	G	/	G	U	A	A	G	U	A	U		+++	45S	+
						U6:5'ss		A	A	G	/	G	U	A	A	C	A	U	A		++	45S	+
						U5:5'ss + U6:5'ss		U	U	G	/	G	U	A	A	C	A	U	A		-	37S	-
						-1G → A		A	A	A	/	G	U	A	A	G	U	A	U		+++	45S	+
						+1G → A		A	A	G	/	A	U	A	A	G	U	A	U		+	45S	+
						+2U → A		A	A	G	/	G	A	A	A	G	U	A	U		+++	45S	+
						/GU → AA		A	A	G	/	A	A	A	A	G	U	A	U		-	37S	-
						G/G → AA		A	A	A	/	A	U	A	A	G	U	A	U		-	37S	-
						G/G → rIrI		A	A	rI	/	rI	U	A	A	G	U	A	U		-	37S	-
								-3	-2	-1	/	+1	+2	+3	+4	+5	+6	+7	+8
