# Supplementary material
Source: HighWire-hosted journal article supplement (doi:10.1101/rna.053991.115)
Supplement: SuppMaterial.docx [file SuppMaterial.docx]

**Supplemental Material**

**Stable tri-snRNP integration is accompanied by a major structural rearrangement of the spliceosome that is dependent on Prp8 interaction with the 5' splice site**

Carsten Boesler1, Norbert Rigo1, Dmitry E. Agafonov1, Berthold Kastner1, Henning Urlaub2, Cindy L. Will1,*, Reinhard Lührmann1,*

1Department of Cellular Biochemistry, Max Planck Institute for Biophysical Chemistry, Am Fassberg 11, D-37077 Göttingen

2Bioanalytical Mass Spectrometry Group, Max Planck Institute for Biophysical Chemistry, Am Fassberg 11, D-37077 Göttingen

*Corresponding authors

**Inventory of Supplemental Material:**

**Supplemental Information**

**Supplemental Figures:**

Figure S1 related to Figure 1

Figure S2 related to Figure 4

Figure S3 related to Figure 5

Figure S4 related to Figure 6

Figure S5 related to Figure 5

**Supplemental Table:**

Table S1 related to Figure 5 & Figure S3 & Figure S5

**Supplemental Information**

**Designation of abundant proteins in 37S cross exon and 45S B-like complexes**

The SR proteins SRSF7 and SRSF10 were also included in the group of abundant factors, despite less intensive staining. Most SR proteins do not migrate as a distinct, single spot but rather diffuse elongated spots during the 2D gel-electrophoresis and they are heavily phosphorylated, which in combination results in the poor staining intensity (Agafonov et al. 2011). hPrp19 was not considered to be abundant despite a similar staining intensity as for example hPrp31, because hPrp19 is present in multiple copies in the spliceosome (Grote et al. 2010; Agafonov et al. 2011). hSmu-1 was also not classified as abundant within the 37S exon complex as previous studies suggest it is present in multiple copies within the spliceosome (Agafonov et al. 2011). hPrp38 and Snu23 were also classified as abundant in the 45S B-like complex despite having a lower staining intensity. These two proteins migrate the longest distance in the first dimension of the 2D gel, which results in the loss of material and less intensive staining after separation in the second dimension (Agafonov et al. 2011).

**Figure Legends**

**Supp. Fig. S1**

**Figure S1 The 5'ss oligo, but not a 2'Ome modified version of it, is stably-associated with splicing complexes that form on the MINX exon RNA.** Spliceosomal complexes were assembled in the presence of a 100-fold excess (relative to the MINX exon RNA) of the wildtype or 2'Ome, 5'-32P-labeled 5'ss oligonucleotide. Lanes 1-2: Input after incubation in splicing reactions. Subsequently they were subjected to glycerol gradient centrifugation and MS2 affinity-selection of the respective peak fractions. RNA was recovered from the eluates, separated by denaturing PAGE and visualized by autoradiography. The positions of MINX exon RNA and 5'-labeled oligonucleotide are indicated. Note that due to the large excess of the 5'ss oligos relative to the MINX exon RNA, the specific activity of the 5'ss oligos was only 350 cpm/pmole in lanes 1-2, but was increased to 27,000 cpm/pmole in lanes 4 and 6, whereas that of the MINX exon RNA was 30,000 cpm/pmole in all lanes. The similar intensity of the MINX exon RNA and 5'ss oligo in lane 4, confirms that there is a 1:1 stoichometry of the exon RNA and the 5'ss oligo in the affinity-purified B-like complex.

**Figure S2 Addition of a 5'ss oligonucleotide to affinity-purified 37S exon complexes stabilizes U4/U6.U5 tri-snRNP binding.** (**A**) Analytical glycerol gradient centrifugation (150 mM KCl) of affinity-purified 37S exon complexes or after addition of wildtype or 2'Ome 5'ss oligonucleotide. Purified 45S B-like complexes were run in parallel. (**B**) Peak fractions from the gradients were used for MS2 affinity-selection. RNA was recovered from the purified complexes, separated by denaturing PAGE and visualized by silver staining. Identities of snRNAs are indicated.

**Figure S3 Sedimentation behaviour of cross-exon complexes incubated in nuclear extract with various mutated 5'ss oligonucleotides. (A,B)** Glycerol gradient centrifugation (150 mM KCl) of complexes formed in extracts on 32P-labeled MINX exon RNA in splicing reactions upon addition of the indicated 5'ss oligonucleotides. The percent of total radioactivity is plotted for each gradient fraction. Sedimentation values were determined using prokaryotic ribosomal subunits run in parallel. (**C**) Western blot of the complexes formed +/- the indicated 5'ss oligo, immunostained with antibodies against the phosphorylated form of hPrp31 (hPrp31 phos) or the indicated B-specific protein. Antibodies against hSnu66 were used to ensure equal loading.

**Figure S4 Crosslinking of proteins with nucleotides at the exon-intron junction of the 5'ss oligo.** (**A-C**) 45S B-like complexes were assembled in the presence of a 5'-32P-labeled 6-thio-G (-1 or +1 position) (panel **A** and **B,** respectively) or 4-thio U (+2 position) (**C**) modified 5'ss oligo. They were then subjected to glycerol gradient centrifugation, and affinity-purified complexes were irradiated at 365 nm (lanes 2, 3, 5, 6) to induce protein-RNA crosslinks, and subsequently treated with RNase A (lanes 3 & 6). Proteins were separated on a 10-13 % polyacrylamide gel and visualized by silver staining (lanes 1-3) or by a phosphoimager (lanes 4-6). *: Position of MINX exon RNA. The more efficient crosslinking of Prp8 at the +2 position compared to -1 and +1 is probably due in part to the fact that 4-thio-U is a more efficient crosslinker than 6-thio-G.

**Figure S5** **Association of various 5'ss oligos with affinity-purified complexes formed on MINX exon RNA.** Spliceosomal complexes were assembled in the presence of a 100-fold excess (relative to the MINX exon RNA) of the wildtype or 2'Ome, 5'-32P-labeled 5'ss oligonucleotide. (**A**) Input after incubation in splicing reactions. (**B, C**) Splicing complexes were subjected to glycerol gradient centrifugation and MS2 affinity-selection of the respective peak fractions. RNA was recovered from the eluates, separated by denaturing PAGE and visualized by autoradiography. The positions of MINX exon RNA and 5'-labeled oligonucleotide are indicated. Note that due to the large excess of the 5'ss oligos relative to the MINX exon RNA, the specific activity of the 5'ss oligos was only 350 cpm/pmole in panel A, but was increased to 27,000 cpm/pmole in panels B and C (~19,000 cpm/pmole in lanes 7-12), whereas that of the MINX exon RNA was 30,000 cpm/pmole in all panels

**Table S1 Summary of the effects of mutations in the 5'ss oligonucleotide on 45S B-like complex formation**

Overview of 5'ss oligo mutants and their effect on the formation of 45S B-like complexes. Exonic nucleotides are represented by a shaded box and mutations are labeled in red. B-like complex formation assayed by native gel analysis was classified as wildtype level (+++), reduced (++), strongly reduced (+) or abolished (-). Sedimentation values of the spliceosomal complexes were determined by glycerol gradient centrifugation and co-purification of 5'-32P-labeled 5'ss oligos was detected by MS2 affinity-selection followed by denaturing PAGE. By comparing the specific activity of the uniformly 32P-labeled MINX exon RNA and the 5'-labeled 5'ss oligos, we determined that approximately one 5'ss oligo interacts with one 45S B-like complex.

**References**

Grote M, Wolf E, Will CL, Lemm I, Agafonov DE, Schomburg A, Fischle W, Urlaub H, Lührmann R. 2010. Molecular architecture of the human Prp19/CDC5L complex. *Mol Cell Biol* **30:** 2105–2119.
